1       **MUSCLE MITOCHONDRIAL CAPACITY AND ENDURANCE IN ADULTS**

2                                   **WITH TYPE 1 DIABETES**

3

4

5       Riley A. Hewgley, Bethany T. Moore, T. Bradley Willingham, Nathan T. Jenkins, Kevin

6       K. McCully\*

7

8       Dept. of Kinesiology, University of Georgia, Athens, GA 30602

9

10

11       \*Corresponding author

12

13       Email: [mccully@uga.edu](mailto:mccully@uga.edu)

14

## ABSTRACT

15  
16 The impact of type 1 diabetes (T1D) on muscle endurance and oxidative capacity is  
17 currently unknown. **Purpose:** Measure muscle endurance and oxidative capacity of adults  
18 with T1D compared to controls. **Methods:** A cross-sectional study design with a control  
19 group was used. Subjects (19-37 years old) with T1D (n=17) and controls (n=17) were  
20 assessed with hemoglobin A1c (HbA1c) and casual glucose. Muscle endurance was  
21 measured with an accelerometer at stimulation frequencies of 2, 4, and 6 Hz for a total of  
22 nine minutes. Mitochondrial capacity was measured using near-infrared spectroscopy after  
23 exercise as the rate constant of the rate of recovery of oxygen consumption. **Results:** T1D  
24 and control groups were similar in age, sex, height, and race. The T1D group had slightly  
25 higher BMI values and adipose tissue thickness over the forearm muscles. Casual glucose  
26 was  $150 \pm 70$  mg/dL for T1D and  $98 \pm 16$  mg/dL for controls ( $P=0.006$ ). HbA1c of T1D  
27 subjects was  $7.1 \pm 0.9\%$  and  $5.0 \pm 0.4\%$  for controls ( $P<0.01$ ). Endurance indexes at 2, 4,  
28 and 6 Hz were  $94.5 \pm 5.2\%$ ,  $81.8 \pm 8.4\%$ , and  $68.6 \pm 13.5\%$  for T1D and  $94.6 \pm 4.1\%$ ,  
29  $85.9 \pm 6.3\%$ , and  $68.7 \pm 15.4\%$  for controls ( $p = 0.97, 0.12, 0.99$ , respectively). There were  
30 no differences between groups in mitochondrial capacity (T1D=  $1.9 \pm 0.5$  min<sup>-1</sup> and  
31 control= $1.8 \pm 0.4$  min<sup>-1</sup>,  $P=0.29$ ) or reperfusion rate (T1D=  $8.8 \pm 2.8$ s and control= $10.3 \pm 3.0$ s,  
32  $P=0.88$ ). There were no significant correlations between HbA1c and either muscle  
33 endurance, mitochondrial capacity or reperfusion rate. **Conclusions:** Adults with T1D did  
34 not have reduced oxidative capacity, muscle endurance or muscle reperfusion rates  
35 compared to controls. HbA1c also did not correlate with muscle endurance, mitochondrial  
36 capacity or reperfusion rates. Future studies should extend these measurements to older  
37 people or people with poorly-controlled T1D.

38

39 **Keywords:** Near Infrared Spectroscopy (NIRS), Electrical Stimulation, skeletal muscle,  
40 Fatigability

41 **INTRODUCTION**

42           Type 1 diabetes (T1D) is a prevalent autoimmune disease resulting from specific  
43 immune-mediated destruction of pancreatic beta cells, which is managed using multiple  
44 daily injections of insulin or an insulin pump along with careful monitoring of blood  
45 glucose levels (1). If unmanaged or poorly treated, this disease can have consequences on  
46 all organ systems, especially cardiovascular and renal, due to impacts on macro- and  
47 microvascular systems, including atherosclerosis, endothelial permeability, and thickening  
48 of capillary walls (2). T1D is also associated with decreased mitochondrial oxygen  
49 consumption and impaired oxidative phosphorylation efficiency (3). Declining heart health  
50 in those with T1D could be a direct result of chronic deterioration of mitochondrial function  
51 due to oxidative stress (4, 5). People with T1D also report elevated fatigue that may be due  
52 to increased pain, sleep disturbances, depressive symptoms, or the physiological impacts  
53 of their condition (6). In a previous study, mitochondrial DNA mutations were observed in  
54 diabetic tissues potentially due to oxidative stress (7). A loss of muscle mass and fiber  
55 atrophy has been associated with T1D (8) as well as decreased muscle strength (9), but  
56 previous studies have been unable to confirm a relationship between fatigue and glucose  
57 control in people with T1D. Further evidence is needed to determine the onset and effects  
58 of T1D on mitochondria function and implications for muscle endurance.

59           Neuromuscular electrical stimulation (NMES) is a technique that has been used in  
60 combination with a tri-axial wireless accelerometer to determine skeletal muscle endurance  
61 (10-12). NMES has also been used in various other forms of assessing fatigue including  
62 handgrip fatigue (13) due to reduced variability associated with controlled, artificial  
63 exercise. Near infrared spectroscopy (NIRS) has been used in previous studies as a non-  
64 invasive approach to measuring muscle oxygen consumption as a gauge of mitochondrial

65 capacity (14-16) as well as skeletal muscle blood flow (17). These technologies have been  
66 applied to other populations, such as those with Friedrich's Ataxia (10), spinal cord injuries  
67 (18), and peripheral vascular disease (19).

68 The purpose of this study was to determine the association of T1D in young adults  
69 with muscle endurance, mitochondrial capacity, and muscle reperfusion. We hypothesized  
70 that T1D would be associated with reduced muscle endurance, a decreased rate of recovery  
71 of muscle oxygen consumption, and a longer reperfusion rate.

72

## 73 **METHODS**

74

75 **Participants:** Subjects either had a diagnosis of T1D (n = 17), or were healthy  
76 controls (n = 17) and between 18-40 years old were recruited to produce similar group  
77 averages for age, sex, height, and weight. Exclusion criteria included the presence any  
78 neuromuscular, cardiovascular, and endocrine diseases (except for T1D). The study was  
79 approved by the University of Georgia IRB, and all subjects gave informed consent.

80 **Experimental design:** This experiment was a cross-sectional evaluation between  
81 T1D and control groups. After eligibility was determined with a screening form, subjects  
82 completed a medical history. Testing sessions consisted of three main components: clinical  
83 measurements, an electrical stimulation endurance test, and a near-infrared spectroscopy  
84 (NIRS) test of mitochondrial capacity. The tests were performed on the wrist-finger flexors  
85 of the non-dominant forearm: the flexor carpai radialis, flexor carpai ulnaris, and palmaris  
86 longis muscles. The forearm muscles were chosen because they are a relatively untrained  
87 group of muscles that are not directly influenced by regular physical activity levels.

88 **Experimental Procedures:** Health indicators included measurements of casual  
89 blood glucose, HbA1c, and adiposity above the forearm muscles. HbA1c and casual

90 glucose measurements were taken for every participant. Casual glucose was taken by  
91 finger-stick at the time of testing without prior instruction or fasting, and measured with a  
92 glucometer (OneTouch LifeScan, Inc., Milpitas, CA). HbA1c was measured by finger-  
93 stick in the same manner with a rapid HbA1c device (Accu-chek, Roche, Indianapolis, IN).  
94 Adipose tissue thickness over the forearm muscle was measured with B-mode ultrasound  
95 (GE Logic Q, GE Medial, Milwaukee, WI) as a routine control variable for NIRS  
96 measurements. This measurement was recorded and used to adjust separation distances of  
97 the NIRS optical probes.

98         The endurance test (12) was performed as the participant lay supine on a padded  
99 table with the non-dominant arm outstretched comfortably and secured at 90 degrees on a  
100 table extension to decrease movement (Figure 1a). A tri-axial, wireless accelerometer  
101 (WAX9, Axivity, UK) was attached to the skin at the belly of the forearm muscles using  
102 double-sided adhesive tape. Two electrode pads (2in x 4in) were placed 2 cm proximal and  
103 2 cm distal of the accelerometer. Prior to the start of the test, stimulation current  
104 (Theratouch 4.7, Rich-Mar, USA) was adjusted until a characteristic, visible contraction  
105 was observed. Data collection began with a 15-second baseline measurement, and then  
106 stimulation of the forearm muscle began by applying twitch electrical stimulation in three  
107 stages of increasing stimulation frequencies (2, 4, and 6 Hz). Each stage was 3 minutes,  
108 was separated by 15 seconds of rest, and concluded with 15 seconds of recovery after  
109 stimulation. Twitch-induced surface oscillations in the X, Y, and Z directions gave the  
110 force of muscle contractions measured by the accelerometer. Data were collected at an  
111 acquisition frequency of 400Hz via a Bluetooth communication port. Reproducibility for  
112 the 2,4, and 6 Hz endurance index measurements in control subjects was 2.5-7.4% (12).

113 Mitochondrial capacity (20) was measured as the rate of recovery of oxidative  
114 metabolism after exercise using NIRS (Figure 1b). The NIRS device (Oxymon, Artinis  
115 ltd, Amsterdam, NL) was placed directly above the belly of wrist-finger flexors. Electrical  
116 stimulation pads were placed on the forearm, above and below the NIRS device, and an  
117 inflatable cuff was placed above the elbow proximal to the NIRS device. The inflation  
118 pressure of the cuff was approximately 100 mm Hg above systolic pressure. After 30  
119 seconds of rest, the cuff was inflated for five minutes or until plateau of the oxygenated  
120 and deoxygenated signals to deplete the oxygen in the muscle by occluding arterial blood  
121 flow, representing 0% O<sub>2</sub> saturation or ischemia. Upon release of the cuff, oxygen returned  
122 to the muscle, creating a hyper-oxygenation response representing 100% O<sub>2</sub> saturation or  
123 hyperemia. These two points were used in the calibration of the signal for the NIRS signals.  
124 The time from the release of the cuff to 100% O<sub>2</sub> saturation was recorded as the time-to-  
125 half recovery, or reperfusion, of oxygen saturation and was used as an index of  
126 microvascular blood flow (21). After the calibration cuff, the muscle was stimulated for  
127 15 seconds at 6 Hz as exercise to increase metabolic rate. Immediately following electrical  
128 stimulation, a recovery test cuff protocol was performed: cuffs 1 through 10 were 5 seconds  
129 on, 5 seconds off; cuffs 11 through 15 were 7 seconds on, 7 seconds off; cuffs 16 through  
130 18 were 10 seconds on, 15 seconds off, and cuffs 19 and 20 were 10 seconds on, 20 seconds  
131 off. The exercise and cuff protocol was repeated, and the two recovery tests were averaged  
132 to measure the rate of recovery of muscle oxygen consumption, representing mitochondrial  
133 oxidative capacity. Reproducibility of the mitochondrial capacity measurements has been  
134 reported to be 12% in a previous study on the medial gastrocnemius muscle (22).

135           **Data Analysis and Statistics:** For the muscle endurance test, peak-to-peak  
136 oscillations throughout stimulation was analyzed through Microsoft Excel and a MatLAB  
137 analysis routine (12). The endurance index was calculated as the end acceleration of the  
138 frequency period divided by the peak acceleration at the start of the stimulation period  
139 multiplied by 100 percent to allow for comparison within and between groups. Oxymon  
140 software was used to collect the data for the NIRS test, and the data was analyzed with a  
141 Matlab analysis routine. Comparisons between groups were made with unpaired, two-  
142 tailed T tests using SPSS. Statistical significance was accepted with a p value <0.05.  
143 Power estimates suggested that with a sample size of 17 per group and a population  
144 variance of 20%; a difference between groups of 20% could be detected in the  
145 mitochondrial rate constant with a power of 0.83.

146

## 147 **RESULTS**

148           The subject's physical characteristics are shown in Table 1. Subjects with T1D had  
149 higher casual glucose and HbA1c levels than controls, as expected. The subjects with T1D  
150 also had slightly higher BMI and forearm adiposity measurements.

151           Muscle endurance, measured as the endurance index, was not different between  
152 subjects with T1D and controls ( $p = 0.97, 0.12, 0.99$  for 2, 4, and 6 Hz respectively) (Figure  
153 1A). Muscle mitochondrial capacity measured as the recovery rate constant was also not  
154 different between subjects with T1D and controls ( $p = 0.29$ ) (Figure 1B). Muscle  
155 reperfusion rate measured as the half time of recovery of oxygen saturation was not  
156 different between subjects with T1D and controls ( $p = 0.88$ ) (Figure 1C). There was no  
157 relationship between HbA1c levels and Muscle endurance (6 Hz), mitochondrial capacity



158 or muscle reperfusion rate ( $r^2$  values of 0.01, 0.10, and 0.01, respectively). There was also  
159 no relationship between subject age and time since diagnosis and the measurements of  
160 Muscle endurance (6 Hz), muscle mitochondrial capacity and muscle reperfusion rate ( $r^2$   
161  $< 0.1$  for all comparisons).

162

## 163 **DISCUSSION**

164 The primary findings of this study were that muscle endurance and muscle  
165 mitochondrial capacity were not different between adults with T1D and controls. Previous  
166 studies have suggested that type 2 diabetes is associated with increased fatigue (reduced  
167 endurance) (23-27). However, there has been less research on muscle endurance and  
168 muscle mitochondrial capacity in people with T1D. Approximately 75% of people with  
169 T1D report persistent symptoms of fatigue (6), and T1D is thought to accelerate muscle  
170 aging (28) and result in pathological changes in skeletal muscle (8). One previous study  
171 by Cree-Green et al. reported reduced muscle mitochondrial OxPhos after exercise, marker  
172 of mitochondrial capacity, in adolescents (mean age of 15 yrs) with T1D (4). It is not clear  
173 how to compare our results to theirs. Cree-Green et al. reported no difference in  
174 phosphocreatine recovery rates after exercise, a marker of mitochondrial capacity  
175 analogous to the NIRS based recovery rate constants used in our study (29). In a study on  
176 adults with T1D during a two day endurance cycling event, investigators found  
177 significantly decreased power output was associated with low blood glucose levels, likely  
178 resulting from suboptimal dietary carbohydrate intake rather than a mitochondrial deficit  
179 (30). A study by Harmer et al. reported that any fatigue associated with T1D is not  
180 associated with impaired muscle calcium kinetics and that fatigue reported in people with

181 T1D may originate outside the skeletal muscle (31). Our findings add to this small body  
182 of research, providing direct support for the hypothesis that T1D in adults is not associated  
183 with reduced muscle endurance or muscle mitochondrial capacity.

184         There were no differences muscle reperfusion rate between adults with T1D and  
185 controls. We had hypothesized that T1D might damage blood vessels due to chronic  
186 hyperglycemia and accompanying increased variability in blood glucose levels (32, 33).  
187 Previous studies have shown that the rate of muscle reperfusion is an indicator of impaired  
188 circulation (34, 35). While the subjects in our study were relatively young and had well-  
189 controlled blood sugar and HbA1c levels, previous studies have suggested vascular  
190 abnormalities in similar populations (36, 37). Additional studies on older subjects with  
191 T1D or in subjects with a history of poor glycemic control would be needed to better  
192 understand the impact of T1D on muscle reperfusion rates.

193         In the present study, no correlations were found between well-controlled people  
194 with T1D in the parameters tested regarding age, time since diagnosis, or HbA1c levels.  
195 Previous studies have also found weak or no relationships within populations of people  
196 with T1D and HbA1c levels or other indications of glycemic control (37). However, some  
197 studies have reported relationships between vascular function (nitrate stimulated brachial  
198 artery diameter changes) and HbA1c (33). The inconsistency of the relationship between  
199 vascular dysfunction and glycemic control in people with T1D may reflect the impact of  
200 compounding health risks, such as obesity, inactivity, stress and genetic factors (38, 39).

201

202         The strengths of this study were that the tests performed were non-invasive and  
203 time-efficient (40). Even vulnerable populations such as those with spinal cord injury are

204 able to tolerate NIRS testing and electrical stimulation (41). These methods and  
205 technologies can easily be used in a clinical setting to evaluate the individual with little  
206 inconvenience and a high level of accuracy and reproducibility (20 ). There are alternative  
207 ways to measure mitochondrial capacity including <sup>31</sup>P magnetic resonance spectroscopy  
208 (42); however, this approach is limited by its high cost and limited availability. In addition,  
209 there are complications related to strong magnetic fields used by P magnetic resonance  
210 spectroscopy and the use of insulin pumps by people with T1D. An advantage of the current  
211 study was the use of the wrist-finger flexor muscles. These muscles are less activity  
212 dependent than muscles in the leg as the primary physical activity in most people is  
213 walking.

214 A limitation of the present study is that T1D subjects were adults with relatively  
215 healthy HbA1c levels indicating they had well controlled blood sugar levels. Most of the  
216 subjects in our study were 19-22 years of age. While our study did include some adults  
217 who were 25-31 years of age, the sample size for this adult population was too low to  
218 provide confidence in a sub-group analysis. Future studies should evaluate more subjects  
219 who are older or with poor glycemic control or a longer disease duration to determine  
220 health implications of a heavier disease burden. A disadvantage of using the forearm is  
221 that it does not reflect training adaptations related to different activity levels. Our  
222 experiment did not test if T1D impacts the ability to train mitochondria and impact  
223 endurance (43).

224

225 **CONCLUSIONS**

226           There were no differences seen between well-controlled adults with T1D and  
227 similar controls in muscle endurance, mitochondrial capacity, or muscle reperfusion rate.  
228 We had hypothesized that T1D might have reduced muscle endurance and mitochondrial  
229 capacity due to suggestions of accelerated mitochondrial aging in this population. Poor  
230 glycemic control is also associated with vascular pathology. We also did not see evidence  
231 within our generally well controlled T1D subjects of relationships between muscle  
232 endurance, muscle mitochondrial capacity, and muscle reperfusion rate and HbA1c levels.  
233 It is possible that older or less well controlled subjects with T1D would have evidence of  
234 impaired muscle function. More testing would need to be performed to understand the  
235 effects of T1D muscle endurance, mitochondrial capacity, and microvascular function in  
236 this subjects with T1D across ages and with different levels of glycemic control.

237

### 238 **Acknowledgements**

239           The results of this study are presented clearly, honestly, and without fabrication,  
240 falsification, or inappropriate data manipulation. This research was supported by the NIH  
241 grant 1R41DK112497 and the UGA Center for Undergraduate Research Opportunities  
242 Research Assistantship Program (R.A. Hewgley and B.T. Moore). We would like to  
243 express gratitude to Hannah Bossie, Jared Brizendine, Melissa Erickson, and Shuan Goh  
244 for assistance with NIRS and muscle endurance methods and Peri Levey for her assistance  
245 with our protocol and subjects.

246

### 247 **Conflict of interest**

248           One of the authors, Kevin McCully, is the President and Chief Science Officer of  
249   Infrared Rx, Inc, a company that develop analysis software related to the NIRS  
250   measurements.

251

252 Figure 1. A) Experimental set up for the measurements of muscle endurance on the  
253 forearm muscles. B) Experimental set up for measurements of muscle mitochondrial  
254 capacity and muscle reperfusion rate. The white pads are stimulation electrodes. The  
255 black objects between the electrodes are either the accelerometer or the NIRS device.  
256 The blue wrapping is the cuff for the rapid cuff inflator.

257

258 Figure 2. A) Muscle endurance measured in percentage in people with T1D versus  
259 controls at 2, 4, and 6 Hz. n=17 both groups. B) Mitochondrial capacity given in rate  
260 constant (1/min) in people with T1D versus controls. n=17 both groups. C) Muscle  
261 reperfusion rate measured in seconds in people with T1D versus controls. n=17 both  
262 groups. Values are means  $\pm$  SD. No statistical differences were found for any of the  
263 comparisons in these figures.

264

265

266

267 **Table 1.** Characteristics of the Control and T1D groups.

|                       |                         | <b>Control</b> | <b>T1D</b>   | <b>p value</b> |
|-----------------------|-------------------------|----------------|--------------|----------------|
| <b>Age</b>            | <b>Years</b>            | 23.2 ± 4.1     | 23.7 ± 5.8   | 0.76           |
| <b>Sex</b>            | <b>Male</b>             | 3              | 6            |                |
|                       | <b>Female</b>           | 2              | 11           |                |
| <b>Race</b>           | <b>White</b>            | 16             | 16           |                |
|                       | <b>Black</b>            | 1              | 1            |                |
| <b>Height</b>         | <b>cm</b>               | 169.0 ± 9.6    | 170.4 ± 11.1 | 0.69           |
| <b>Weight</b>         | <b>kg</b>               | 67.8 ± 14.7    | 76.8 ± 13.0  | 0.07           |
| <b>BMI</b>            | <b>kg/m<sup>2</sup></b> | 23.6 ± 3.2     | 26.3 ± 2.7   | 0.01*          |
| <b>Adipose</b>        | <b>cm</b>               | 0.4 ± 0.1      | 0.5 ± 0.2    |                |
| <b>Casual glucose</b> | <b>mg/dL</b>            | 98 ± 16        | 150 ± 70     | 0.01*          |
| <b>HbA1c</b>          | <b>%</b>                | 5.0 ± 0.4      | 7.1 ± 0.9    | < 0.001*       |

268

269 n=17 both groups. Values are means ± SD. Asterisks (\*) indicate significance between all  
270 T1D and all controls.

271

272

273 **REFERENCES**

- 274 1. Horton WB, Subauste JS. Care of the Athlete With Type 1 Diabetes Mellitus: A  
275 Clinical Review. *Int J Endocrinol Metab.* 2016;14(2):e36091.
- 276 2. Vaid S, Hanks L, Griffin R, Ashraf AP. Body mass index and glycemic control  
277 influence lipoproteins in children with type 1 diabetes. *J Clin Lipidol.* 2016;10(5):1240-7.
- 278 3. Chen X, Wei S, Yang F. Mitochondria in the pathogenesis of diabetes: a  
279 proteomic view. *Protein Cell.* 2012;3(9):648-60.
- 280 4. Cree-Green M, Newcomer BR, Brown MS, Baumgartner AD, Bergman B, Drew  
281 B, et al. Delayed skeletal muscle mitochondrial ADP recovery in youth with type 1  
282 diabetes relates to muscle insulin resistance. *Diabetes.* 2015;64(2):383-92.
- 283 5. Zhao D, Yang J, Yang L. Insights for Oxidative Stress and mTOR Signaling in  
284 Myocardial Ischemia/Reperfusion Injury under Diabetes. *Oxid Med Cell Longev.*  
285 2017;2017:6437467.
- 286 6. Menting J, Nikolaus S, van der Veld WM, Goedendorp MM, Tack CJ, Knoop H.  
287 Severe fatigue in type 1 diabetes: Exploring its course, predictors and relationship with  
288 HbA1c in a prospective study. *Diabetes Res Clin Pract.* 2016;121:127-34.
- 289 7. Amaral S, Oliveira PJ, Ramalho-Santos J. Diabetes and the impairment of  
290 reproductive function: possible role of mitochondria and reactive oxygen species. *Curr*  
291 *Diabetes Rev.* 2008;4(1):46-54.
- 292 8. Krause MP, Riddell MC, Hawke TJ. Effects of type 1 diabetes mellitus on  
293 skeletal muscle: clinical observations and physiological mechanisms. *Pediatr Diabetes.*  
294 2011;12(4 Pt 1):345-64.
- 295 9. Andreassen CS, Jakobsen J, Flyvbjerg A, Andersen H. Expression of neurotrophic  
296 factors in diabetic muscle--relation to neuropathy and muscle strength. *Brain.*  
297 2009;132(Pt 10):2724-33.
- 298 10. Bossie HM, Willingham TB, Schoick RAV, O'Connor PJ, McCully KK.  
299 Mitochondrial capacity, muscle endurance, and low energy in friedreich ataxia. *Muscle*  
300 *Nerve.* 2017;56(4):773-9.
- 301 11. McCully KK, Prins P, Mistry K, Willingham TB. Muscle-specific endurance of  
302 the trapezius muscles using electrical twitch mechanomyography. *Shoulder Elbow.*  
303 2018;10(2):136-43.
- 304 12. Willingham TB, McCully KK. Assessment of Muscle Fatigue during Twitch  
305 Electrical Stimulation using Accelerometer-based Mechanomyography. *Advances in*  
306 *Skeletal Muscle Function Assessment.* 2017;1(2):14-20.
- 307 13. Bystrom S, Kilbom A. Electrical stimulation of human forearm extensor muscles  
308 as an indicator of handgrip fatigue and recovery. *Eur J Appl Physiol Occup Physiol.*  
309 1991;62(5):363-8.
- 310 14. Hamaoka T, McCully KK, Quaresima V, Yamamoto K, Chance B. Near-infrared  
311 spectroscopy/imaging for monitoring muscle oxygenation and oxidative metabolism in  
312 healthy and diseased humans. *J Biomed Opt.* 2007;12(6):062105.
- 313 15. Motobe M, Murase N, Osada T, Homma T, Ueda C, Nagasawa T, et al.  
314 Noninvasive monitoring of deterioration in skeletal muscle function with forearm cast  
315 immobilization and the prevention of deterioration. *Dyn Med.* 2004;3(1):2.
- 316 16. Willingham TB, McCully KK. In Vivo Assessment of Mitochondrial Dysfunction  
317 in Clinical Populations using Near-Infrared Spectroscopy. *Frontiers in Physiology.*  
318 2017;8(689):1-11.



- 319 17. DeBlasi R, Ferrari M, Natali A, Conti G, Mega A, Gasparetto A. Noninvasive  
320 measurement of forearm blood flow and oxygen consumption by near-infrared  
321 spectroscopy. *Journal Applied Physiology*. 1994;76:1388-93.
- 322 18. Ryan TE, Erickson ML, Young HJ, McCully KK. Case report: endurance  
323 electrical stimulation training improves skeletal muscle oxidative capacity in chronic  
324 spinal cord injury. *Arch Phys Med Rehabil*. 2013;94(12):2559-61.
- 325 19. McCully KK, Halber C, Posner JD. Exercise-induced changes in oxygen  
326 saturation in the calf muscles of elderly subjects with peripheral vascular disease. *Journal*  
327 *of gerontology*. 1994;49(3):B128-34.
- 328 20. Ryan TE, Brizendine JT, McCully KK. A comparison of exercise type and  
329 intensity on the noninvasive assessment of skeletal muscle mitochondrial function using  
330 near-infrared spectroscopy. *J Appl Physiol*. 2013;114(2):230-7.
- 331 21. Willingham TB, Southern WM, McCully KK. Measuring reactive hyperemia in  
332 the lower limb using near-infrared spectroscopy. *J Biomed Opt*. 2016;21(9):091302.
- 333 22. Southern WM, Ryan TE, Reynolds MA, McCully K. Reproducibility of near-  
334 infrared spectroscopy measurements of oxidative function and postexercise recovery  
335 kinetics in the medial gastrocnemius muscle. *Appl Physiol Nutr Metab*. 2014;39(5):521-  
336 9.
- 337 23. Zhu B, Martyn-Nemeth P, Ruggiero L, Park CG, Zhang Y, Fritschi C.  
338 Associations between fatigue, sleep disturbance and eating style in adults with type 2  
339 diabetes: A correlational study. *J Clin Nurs*. 2019.
- 340 24. Park H, Park C, Quinn L, Fritschi C. Glucose control and fatigue in type 2  
341 diabetes: the mediating roles of diabetes symptoms and distress. *J Adv Nurs*.  
342 2015;71(7):1650-60.
- 343 25. Fritschi C, Quinn L, Hacker ED, Penckofer SM, Wang E, Foreman M, et al.  
344 Fatigue in women with type 2 diabetes. *Diabetes Educ*. 2012;38(5):662-72.
- 345 26. Fritschi C, Quinn L. Fatigue in patients with diabetes: a review. *J Psychosom Res*.  
346 2010;69(1):33-41.
- 347 27. Kalra S, Sahay R. Diabetes Fatigue Syndrome. *Diabetes Ther*. 2018;9(4):1421-9.
- 348 28. Monaco CMF, Gingrich MA, Hawke TJ. Considering Type 1 Diabetes as a Form  
349 of Accelerated Muscle Aging. *Exerc Sport Sci Rev*. 2019;47(2):98-107.
- 350 29. Ryan TE, Southern WM, Reynolds MA, McCully KK. A cross-validation of near-  
351 infrared spectroscopy measurements of skeletal muscle oxidative capacity with  
352 phosphorus magnetic resonance spectroscopy. *J Appl Physiol* (1985).  
353 2013;115(12):1757-66.
- 354 30. Hill NE, Campbell C, Buchanan P, Knight M, Godsland IF, Oliver NS.  
355 Biochemical, Physiological and Psychological Changes During Endurance Exercise in  
356 People With Type 1 Diabetes. *J Diabetes Sci Technol*. 2017;11(3):529-36.
- 357 31. Harmer AR, Ruell PA, Hunter SK, McKenna MJ, Thom JM, Chisholm DJ, et al.  
358 Effects of type 1 diabetes, sprint training and sex on skeletal muscle sarcoplasmic  
359 reticulum Ca<sup>2+</sup> uptake and Ca<sup>2+</sup>-ATPase activity. *J Physiol*. 2014;592(3):523-35.
- 360 32. Babar GS, Zidan H, Widlansky ME, Das E, Hoffmann RG, Daoud M, et al.  
361 Impaired Endothelial Function in Preadolescent Children With Type 1 Diabetes. *Diabetes*  
362 *Care*. 2011.

- 363 33. Bjarnegard N, Arnqvist HJ, Lindstrom T, Jonasson L, Jonsson A, Lanne T. Long-  
364 term hyperglycaemia impairs vascular smooth muscle cell function in women with type 1  
365 diabetes mellitus. *Diab Vasc Dis Res.* 2009;6(1):25-31.
- 366 34. McCully K, Halber C, Posner J. Exercise-induced changes in oxygen saturation in  
367 the calf muscles of elderly subjects with peripheral vascular disease. *Journal of*  
368 *Gerontology.* 1994;49(3):B128-B34.
- 369 35. McCully K, Landsberg L, Suarez M, Hofmann M, Posner J. Identification of  
370 peripheral vascular disease in elderly subjects with optical spectroscopy. *Journal of*  
371 *Gerontology: Biological Sciences.* 1997;52A:B159-B65.
- 372 36. Cameron JD, Bulpitt CJ, Pinto ES, Rajkumar C. The Aging of Elastic and  
373 Muscular Arteries: A comparison of diabetic and nondiabetic subjects. *Diabetes Care.*  
374 2003;26(7):2133-8.
- 375 37. Ce GV, Rohde LE, Silva AM, Coutinho MK, Castro AC, Bertoluci MC.  
376 Endothelial Dysfunction Is Related to Poor Glycemic Control in Adolescents with Type 1  
377 Diabetes under 5 Years of Disease: Evidence of Metabolic Memory. *J Clin Endocrinol*  
378 *Metab.* 2011.
- 379 38. Bazzano LA, Serdula MK, Liu S. Dietary intake of fruits and vegetables and risk  
380 of cardiovascular disease. *Curr Atheroscler Rep.* 2003;5(6):492-9.
- 381 39. Black PH. The inflammatory response is an integral part of the stress response:  
382 Implications for atherosclerosis, insulin resistance, type II diabetes and metabolic  
383 syndrome X. *Brain, Behavior, and Immunity.* 2003;17(5):350-64.
- 384 40. Ryan TE, Erickson ML, Brizendine JT, Young HJ, McCully KK. Noninvasive  
385 evaluation of skeletal muscle mitochondrial capacity with near-infrared spectroscopy:  
386 correcting for blood volume changes. *J Appl Physiol.* 2012;113(2):175-83.
- 387 41. Erickson ML, Ryan TE, Young HJ, McCully KK. Near-infrared assessments of  
388 skeletal muscle oxidative capacity in persons with spinal cord injury. *Eur J Appl Physiol.*  
389 2013;113(9):2275-83.
- 390 42. Befroy DE, Falk Petersen K, Rothman DL, Shulman GI. Assessment of in vivo  
391 mitochondrial metabolism by magnetic resonance spectroscopy. *Methods Enzymol.*  
392 2009;457:373-93.
- 393 43. Ryan TE, Southern WM, Brizendine JT, McCully KK. Activity-induced changes  
394 in skeletal muscle metabolism measured with optical spectroscopy. *Med Sci Sports*  
395 *Exerc.* 2013;45(12):2346-52.
- 396

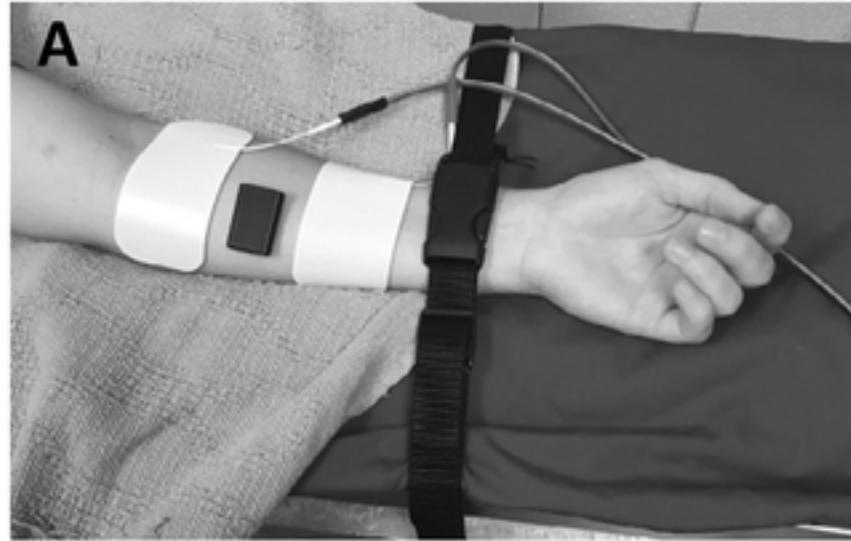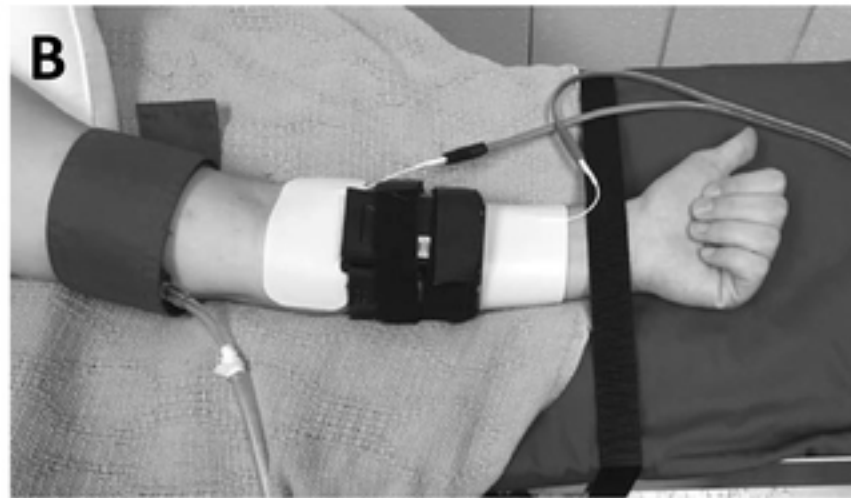

Figure 1

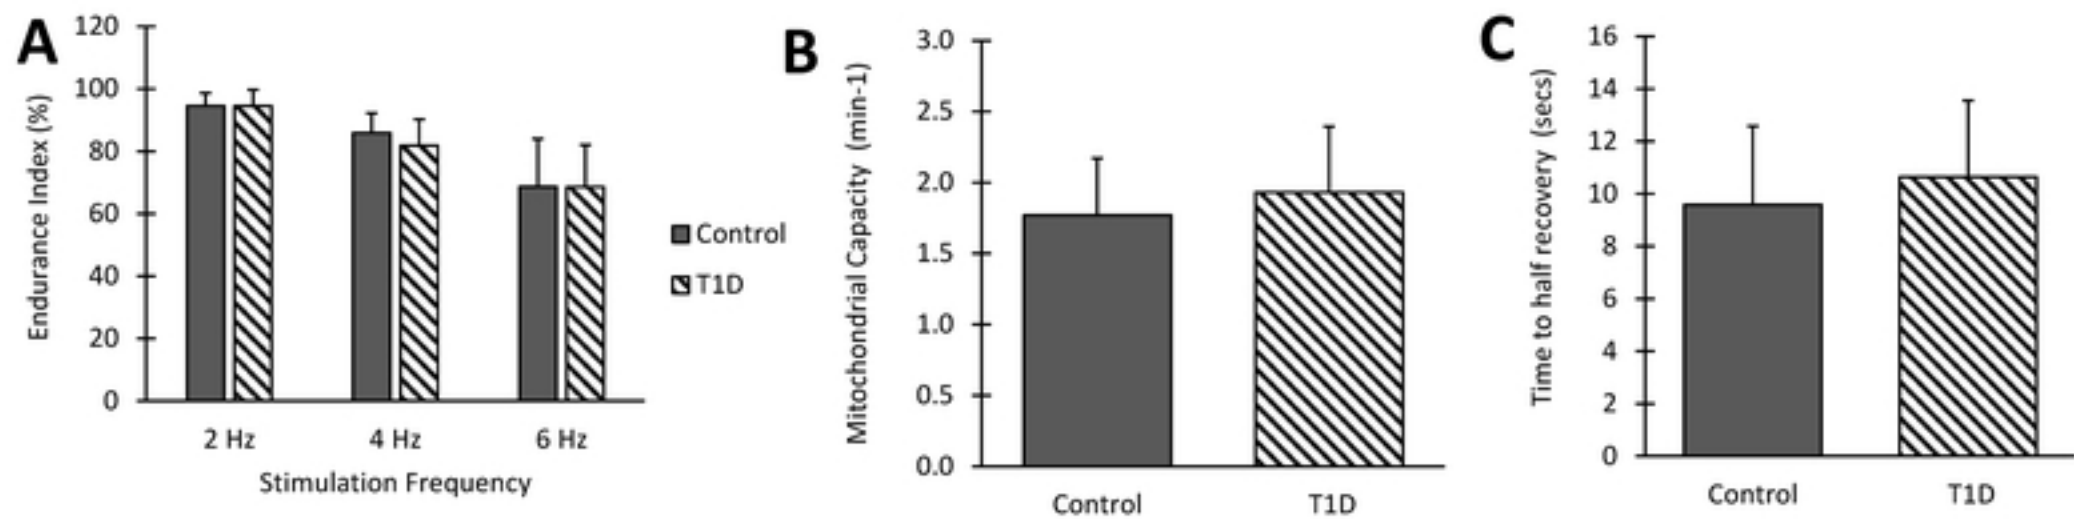

Figure 2
